# Supplementary material for: Rapid and versatile polymer–polymer coupling via iodide–thiol substitution click chemistry
Source: Royal Society of Chemistry journal article supplement (doi:10.1039/d5py00731c), 2025-01-01
Supplement: d5py00731c1.pdf [file d5py00731c1.pdf]

## Supporting Information

# Rapid and Versatile Polymer-Polymer Coupling *via* Iodide-Thiol Substitution Click Chemistry

Jirui Zhang,<sup>a</sup> and Atsushi Goto<sup>\*a</sup>

<sup>a</sup> School of Chemistry, Chemical Engineering and Biotechnology, Nanyang Technological University, 62 Nanyang Drive, 637459, Singapore

### KEYWORDS

Polymer-polymer coupling, iodide-terminated polymers, dithiol linkers, block copolymers, star copolymers.

## 1. Experimental.

### MATERIALS

Butyl acrylate (BA, >99%, Tokyo Chemical Industry (TCI), Japan), 2-iodo-2-methylpropionitrile (CP-I, >95%, TCI), tetrabutylammonium iodide (BNI, >98%, TCI), ethyl  $\alpha$ -bromoisobutyrate (EBiB, 98%, Sigma-Aldrich, USA), copper (II) bromide (Cu(II)Br<sub>2</sub>, 99%, Sigma-Aldrich), *tris*-(2-(dimethylamino)ethyl)amine (Me<sub>6</sub>TREN, Sigma-Aldrich), tetramethylguanidine (TMG, 99%, Sigma-Aldrich), 1,8-diazabicyclo[5.4.0]undec-7-ene (DBU, >98%, Sigma-Aldrich), *N*-ethyldiisopropylamine (EDPA,  $\geq$ 98%, Sigma-Aldrich), *tris*(2-pyridylmethyl) amine (TPMA, >98%, TCI), 1,8-octanedithiol (ODT, >97%, Sigma-Aldrich), 1,16-hexadecanedithiol (HDDT, 99%, Sigma-Aldrich), trimethylolpropane *tris*(3-mercaptopropionate) (TMPT,  $\geq$ 95%, Sigma-Aldrich), pentaerythritol *tetrakis*(3-mercaptopropionate) (PATM,  $\geq$ 95%, Sigma-Aldrich), benzyl mercaptan (BMC, 99%, Sigma-Aldrich), 1-phenylethyl mercaptan (PEMC, Aldrich<sup>CPR</sup>, Sigma-Aldrich), 2-(Boc-amino)ethanethiol (Boc-SH, 97%, Sigma-Aldrich), glutathione (GLT, pharmaceutical secondary standard, Sigma-Aldrich) poly(ethylene glycol) methyl ether thiol (PEG<sub>2k</sub>-SH, Sigma-Aldrich), poly(ethylene glycol) dithiol (PEG<sub>1k</sub>-2SH and PEG<sub>1.5k</sub>-2SH, Sigma-Aldrich), 4arm poly(ethylene glycol)-SH (PEG<sub>5k</sub>-4SH and PEG<sub>10k</sub>-4SH, Sigma-Aldrich), dimethyl sulfoxide (DMSO,  $\geq$ 99.7%, Sigma-Aldrich), *N,N*-dimethylformamide (DMF) (>99.5%, Kanto Chemical, Japan) *N,N*-dimethylacetamide (DMAc,  $\geq$ 98%, Sigma-Aldrich), tetrahydrofuran (THF) ( $\geq$ 99.8%, Fisher Chemical, USA), toluene ( $\geq$ 99.5%, Sigma-Aldrich), and Cyrene ( $\geq$ 98.5%, Sigma-Aldrich) were used as received.

## CHARACTERIZATIONS

**NMR:** The proton nuclear magnetic resonance ( $^1\text{H}$  NMR) spectra were recorded at ambient temperature on a Bruker (Germany) BBFO400 spectrometer (400 MHz). Chloroform-*d* ( $\text{CDCl}_3$ , Cambridge Isotope Laboratories, USA) or acetone-*d*<sub>6</sub> (Cambridge Isotope Laboratories) was used as the NMR solvent. The residual non-deuterated solvents and tetramethylsilane (TMS) were used as the internal standards for  $^1\text{H}$  NMR analysis (calibration of chemical shift).

**GPC:** The gel permeation chromatography (GPC) analysis was performed on a Shimadzu LC-2030C Plus liquid chromatography (Tokyo, Japan) equipped with a Shodex (Tokyo, Japan) LF-804 mixed gel column (300 × 8.0 mm; bead size = 6  $\mu\text{m}$ ; pore size = 3000 Å) and a Shodex KF-804L mixed gel column (300 × 8.0 mm; bead size = 7  $\mu\text{m}$ ; pore size = 1500 Å). The eluent was THF at a flow rate of 0.7 mL/min (40 °C). Sample detection was conducted using a Shimadzu differential refractometer RID-20A. The column system was calibrated with standard poly(methyl methacrylate)s (PMMA)s.

**TGA:** The thermal gravimetric analysis (TGA) curves were recorded with TGA Q500 model device (TA instrument, New Castle, US). The TGA analysis was carried out in platinum pans under flowing nitrogen at a flow rate of 60 mL/min with a heating rate of 10 °C/min at a temperature range of 25–600 °C.

**DSC:** The differential scanning calorimetry (DSC) curves were recorded with QSeries DSC Q50 model device (TA instrument). The DSC analysis was conducted using aluminium sample pans under nitrogen flow at a flow rate of 50 mL/min. The samples were cooled down to –60 °C and heated up to 150 °C with a heating rate of 10 °C/min.

**TEM:** The transmission electron microscopy (TEM) images were obtained on a JEM-1400 transmission electron microscope (JEOL, Tokyo, Japan) operated at 100 kV. A polymer (~0.01 mg) was dissolved into 10 mL of THF/I<sub>2</sub> solution (5wt% of I<sub>2</sub>), and the aliquots (5 µL) were drop-casted on carbon-coated grids (200 mesh, supplied by Ted Pella, Redding, US) and dried at room temperature.

**Rheometer:** The rheometer analysis was performed on Anton Paar (Graz, Austria) MCR 702e rheometer equipped with a PP12 configuration (plate to plate diameter of 12 mm). The data were analysed and processed using the RheoCompass software.

## SYNTHETIC PROCEDURE

**General Procedures for Synthesis of PBA–I.** In a typical run (synthesis of PBA<sub>22</sub>–I), a mixture of BA (1.29 mL, 30 equiv), CP–I (58.5 mg, 1 equiv), and BNI (111 mg, 1 equiv) was heated in a Schlenk tube at 110 °C under argon atmosphere with magnetic stirring. After 18 h, the mixture was cooled to room temperature. An aliquot (0.1 mL) was diluted with CDCl<sub>3</sub> and analyzed with <sup>1</sup>H NMR for determining the monomer conversion. Another aliquot (0.1 mL) was diluted with THF and analyzed using GPC. The polymer (rest of the mixture) was purified by precipitation in water/methanol (1/6 (v/v)) mixture (non-solvent). The polymer was dried under the vacuum.

**Synthesis of PBA–Br.<sup>1</sup>** A mixture of BA (2.15 mL, 30 equiv), EBiB (73.4 µL, 1 equiv), Cu(II)Br<sub>2</sub> (2.25 mg, 0.02 equiv), Me<sub>6</sub>TREN (16 µL, 0.12 equiv), and DMSO (2 mL) were added to a septum sealed vial and deoxygenated by purging with argon for 15 min. The polymerization

was conducted under UV box (UVP Cross-linker, Analytik Jena, Germany) ( $\lambda_{\text{max}} \sim 365$  nm) for 18 h. An aliquot (0.1 mL) was diluted with  $\text{CDCl}_3$  and analyzed with  $^1\text{H}$  NMR for determining the monomer conversion. Another aliquot (0.1 mL) was diluted with THF, passed through neutral alumina for removal of copper salts, and analyzed using GPC. The polymer (rest of the mixture) was purified by precipitation in water/methanol (1/6 (v/v)) mixture (non-solvent). The polymer was dried under the vacuum.

**General Procedures for Halogen-Thiol Substitution** In a typical run, a solution of PBA<sub>22</sub>-I (50 mg, 2 equiv), ODT (1.21  $\mu\text{L}$ , 1 equiv), TMG (8.3  $\mu\text{L}$ , 10 equiv), and DMF (0.5 mL) (**Table 1** (entry 13)) was magnetically stirred in a 4 mL glass vial at room temperature under dark for 2.5 h. After the reaction, the solution was diluted with THF and analyzed using GPC. In some cases, the product was purified via reprecipitation in water or a water/methanol mixture (non-solvent) for subsequent NMR, thermal, and rheological analysis. The polymer was dried under the vacuum.

## 2. Synthetic, Coupling, Thermal, NMR, GPC, TGA, DSC, and Viscoelastic Data

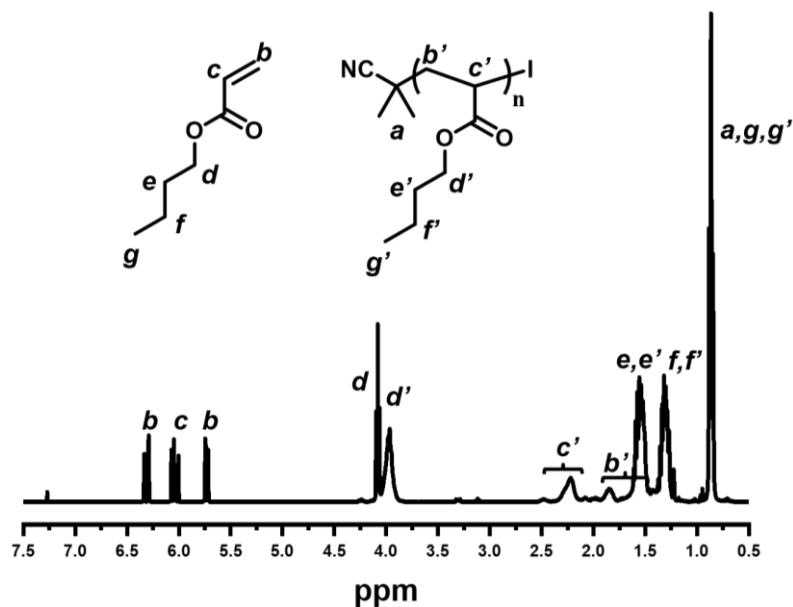

**Fig. S1.**  $^1\text{H}$  NMR spectrum ( $\text{CDCl}_3$ ) of the reaction mixture for the synthesis of PBA-I after the reaction (**Table S1** (entry 1) in Supporting Information). The monomer (BA) conversion was determined from the peak areas of the  $\text{CH}_2\text{O}$  protons in the monomer (peak *d*) and polymer (peak *d'*).

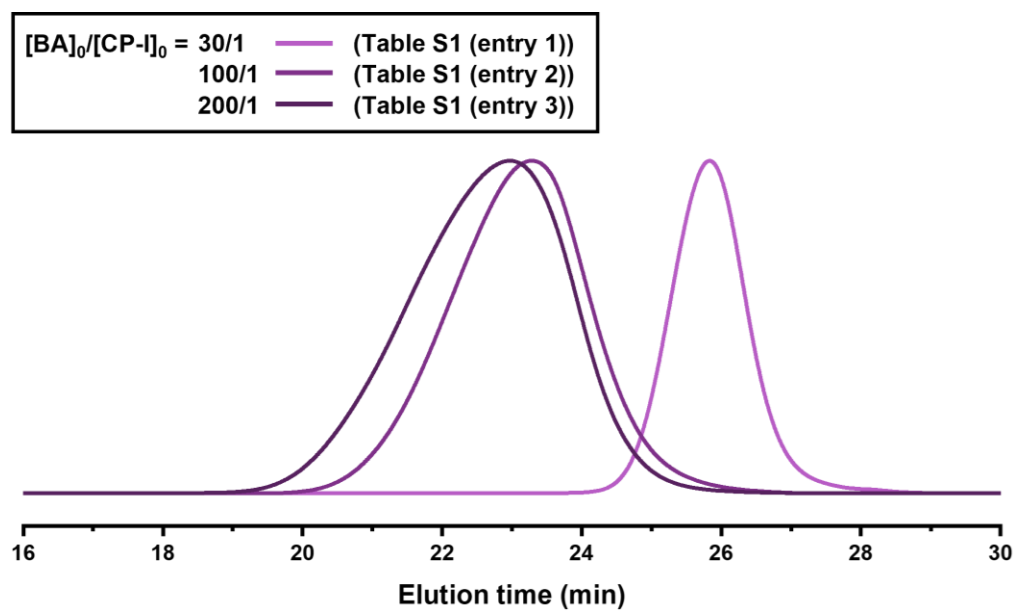

**Fig. S2.** GPC chromatograms of PBA-I (**Table S1** (entries 1–3) in Supporting Information) after purification (reprecipitation).

**Table S1. Synthesis of PBA-I via RCMP and PBA-Br via Copper-Catalyzed ATRP.**

| Entry | R-X  | Catalyst                       | $[BA]_0/[R-X]_0/[catalyst]_0$ | Monomer conversion <sup>a</sup> (%) | Before purification                |             | After purification |             | $DP_{n,theo}^d$ | Polymer               |
|-------|------|--------------------------------|-------------------------------|-------------------------------------|------------------------------------|-------------|--------------------|-------------|-----------------|-----------------------|
|       |      |                                |                               |                                     | $M_n^b$ ( $M_{n,theo}^c$ ) (g/mol) | $\bar{D}^b$ | $M_n^b$ (g/mol)    | $\bar{D}^b$ |                 |                       |
| 1     | CP-I | BNI                            | 30/1/1 <sup>e</sup>           | 72                                  | 3700 (3000)                        | 1.14        | 3800               | 1.12        | 22              | PBA <sub>22</sub> -I  |
| 2     | CP-I | BNI                            | 100/1/1 <sup>e</sup>          | 79                                  | 11000 (10500)                      | 1.41        | 15000              | 1.29        | 79              | PBA <sub>79</sub> -I  |
| 3     | CP-I | BNI                            | 200/1/1 <sup>e</sup>          | 78                                  | 19000 (20000)                      | 1.34        | 22000              | 1.34        | 156             | PBA <sub>156</sub> -I |
| C1    | EBiB | CuBr <sub>2</sub> <sup>f</sup> | 30/1/0.02 <sup>f</sup>        | 97                                  | 4800 (3900)                        | 1.10        | 4900               | 1.10        | 29              | PBA <sub>29</sub> -Br |

<sup>a</sup> Monomer conversion determined using <sup>1</sup>H NMR. <sup>b</sup> PMMA-calibrated GPC values (THF) of polymer <sup>c</sup> Theoretical  $M_n$  value calculated according to  $([BA]_0/[R-X]_0) \times (\text{monomer conversion}) \times (\text{molecular weight of BA}) + (\text{molecular weight of R-X})$ . <sup>d</sup> Theoretical number-average degree of polymerization calculated according to  $[BA]_0/[R-X]_0 \times (\text{monomer conversion})$ . In the present work, the DP value was estimated from the  $[BA]_0/[CP-I]_0$  ratio multiplied by the monomer (BA) conversion. This DP is not an absolute value but should be viewed as an estimate for classifying short to long chains. (The quantitative estimate of the DP value using <sup>1</sup>H NMR was difficult because of <sup>1</sup>H NMR peak overlapping.) <sup>e</sup> The polymerization was conducted at 110 °C for 18 h for entries 1–3. <sup>f</sup> The catalyst was CuBr<sub>2</sub>/Me<sub>6</sub>TREN complex (0.02/0.12 equiv). The polymerization was conducted at an ambient temperature for 18 h under UV light ( $\lambda = 365$  nm) for entry C1. CuBr<sub>2</sub> was in situ reduced to CuBr by an excess amount of Me<sub>6</sub>TREN under light.



PBA<sub>22</sub>-I / ODT / TMG system (2/1/10 equiv) in DMF (Table 1 (entry 13))

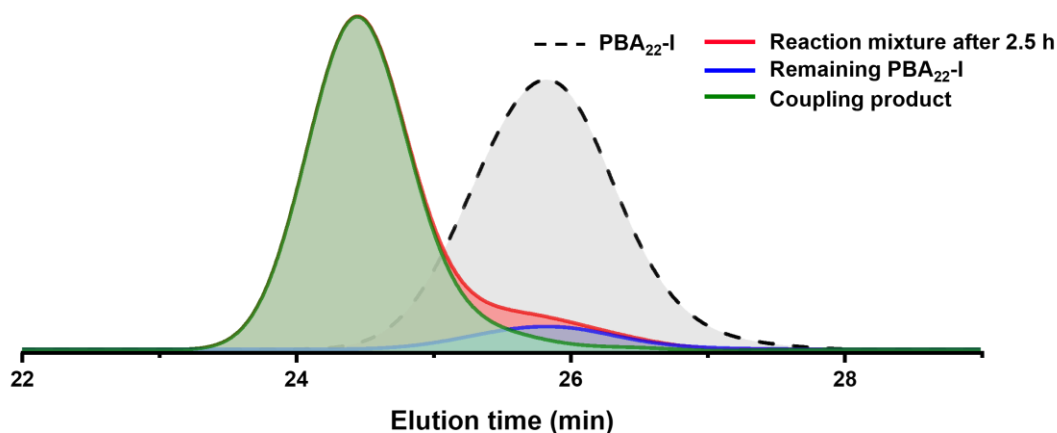

**Fig. S3.** GPC chromatograms of the original PBA<sub>22</sub>-I (black dashed line) and the reaction mixtures of PBA<sub>22</sub>-I (2 equiv), ODT (1 equiv), TMG (10 equiv), and DMF at ambient temperature for 2.5 h (red solid line) (**Table 1** (entry 13)). The chromatogram of the reaction mixture (red solid line) was resolved into the unreacted PBA<sub>22</sub>-I (blue solid line) and the coupling product (green solid line). In the peak resolution, (the shape of) the chromatogram of PBA<sub>22</sub>-I is known. Thus, the chromatogram of PBA<sub>22</sub>-I (blue solid line) was subtracted from the chromatogram of the reaction mixture (red solid line) to give the chromatogram of the coupling product (green solid line).

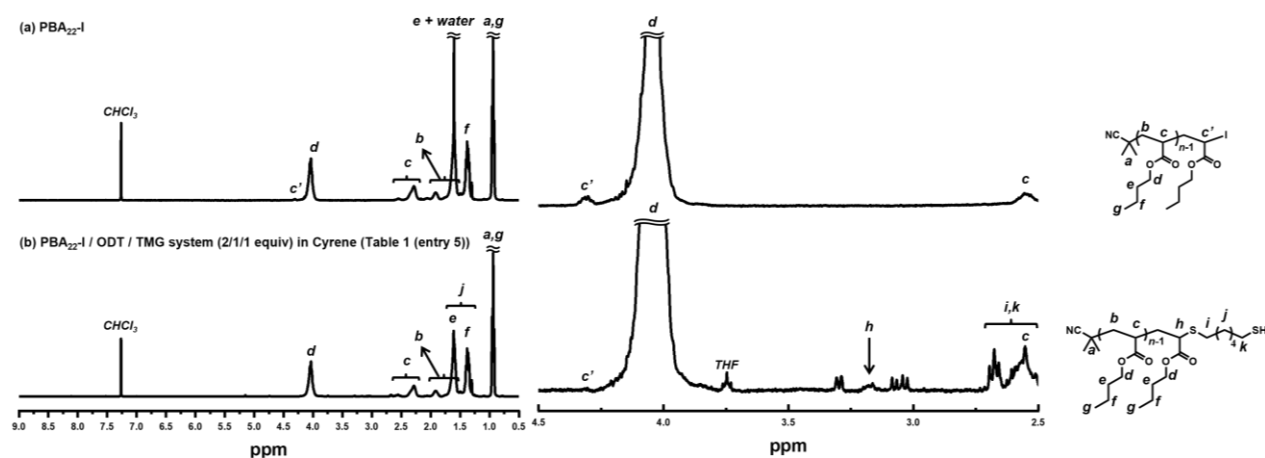

**Fig. S4.** <sup>1</sup>H NMR spectra (CDCl<sub>3</sub>) of (a) the original PBA<sub>22</sub>-I and (b) the purified polymer after the reaction of PBA<sub>22</sub>-I (2 equiv), ODT (1 equiv), TMG (1 equiv), and Cyrene at ambient temperature for 2.5 h (**Table 1** (entry 5)).

PBA<sub>22</sub>-I / ODT / Catalyst (2/1/1 equiv) in DMF (Table 1 (entries 1 and 6–9))

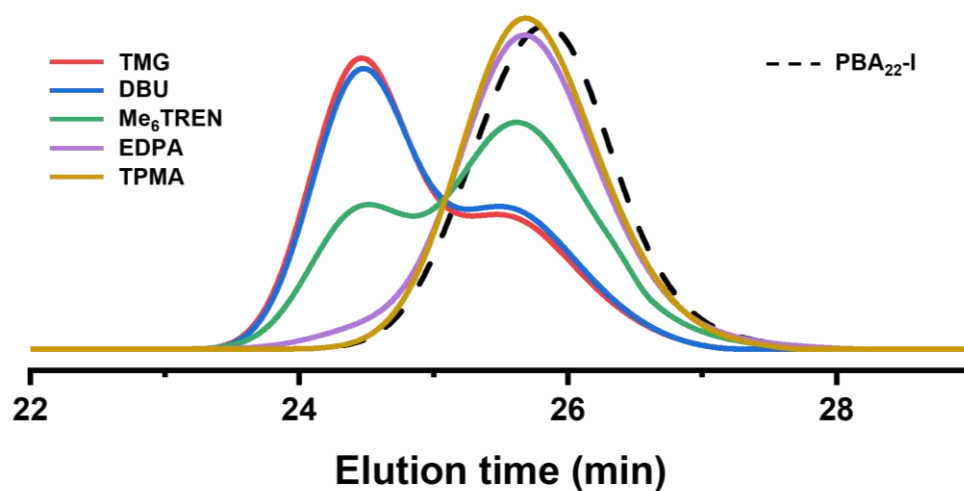

**Fig. S5.** GPC chromatograms of the original PBA<sub>22</sub>-I (black dashed line) and the reaction mixtures of PBA<sub>22</sub>-I (2 equiv), ODT (1 equiv), catalyst (1 equiv), and DMF at ambient temperature for 2.5 h (Table 1 (entries 1 and 6–9)). The catalysts are indicated in the figure.

PBA<sub>29</sub>-Br / ODT / TMG (2/1/10 equiv) in DMF (Table 1 (entry C1))

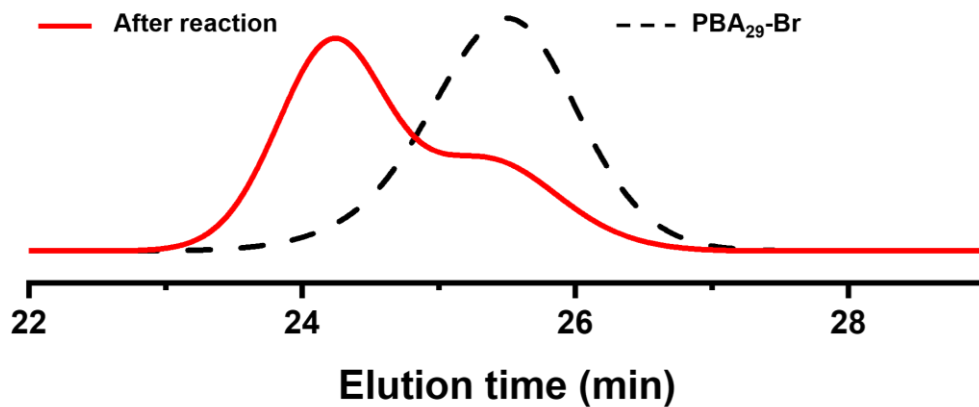

**Fig. S6.** GPC chromatograms of the original PBA<sub>29</sub>-Br (black dashed line) and the reaction mixtures of PBA<sub>29</sub>-Br (2 equiv), ODT (1 equiv), TMG (10 equiv), and DMF at ambient temperature for 2.5 h (red solid line) (Table 1 (entry C1)).

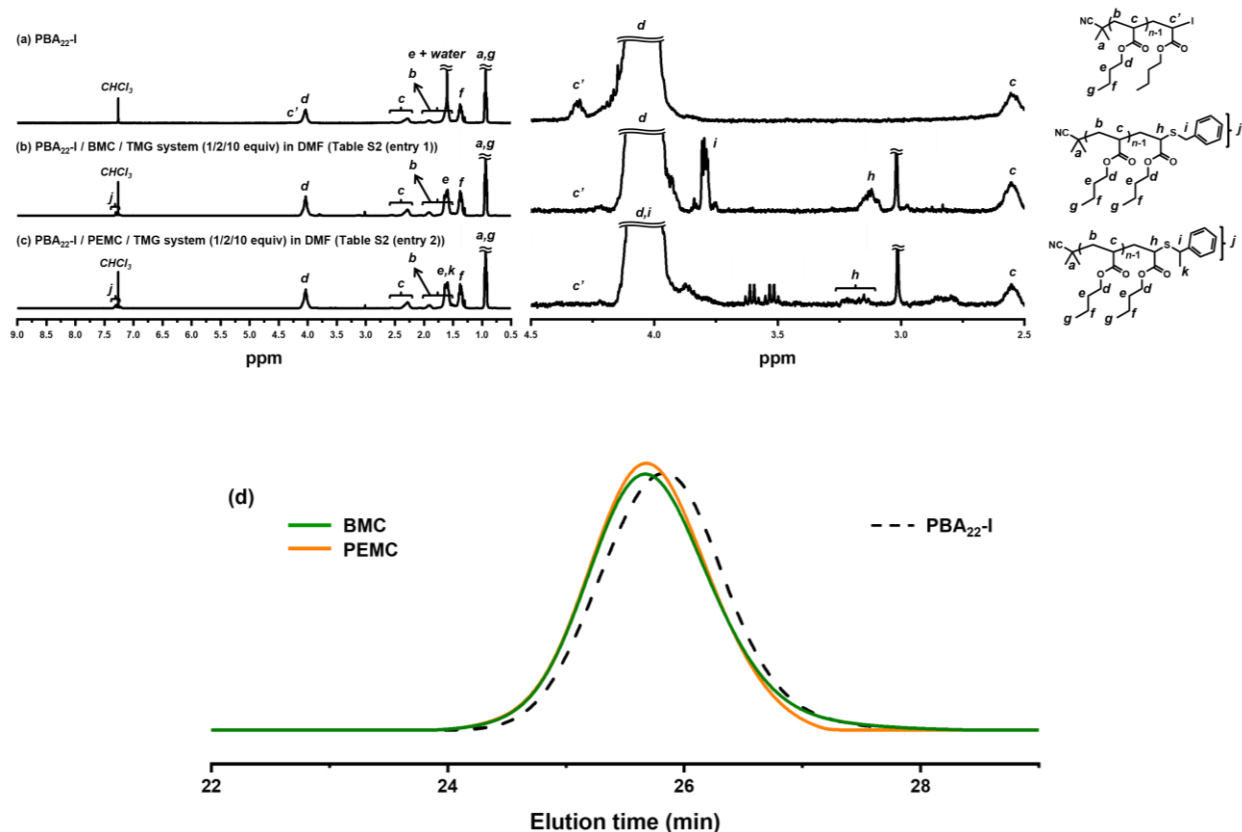

**Fig. S7.**  $^1\text{H}$  NMR spectra ( $\text{CDCl}_3$ ) of (a) the original PBA<sub>22</sub>-I, and the purified products after the reaction of PBA<sub>22</sub>-I (1 equiv), monothiol (2 equiv), catalyst (10 equiv), and DMF at ambient temperature for 2.5 h, where the monothiol was (b) BMC and (c) PEMC (Table S2 (entries 1 and 2) in Supporting Information). (d) GPC chromatograms of the original PBA<sub>22</sub>-I (black dashed line) and the reaction mixtures after the reaction (solid lines) (Table S2 (entries 1 and 2) in Supporting Information). The monothiols are indicated in the figure.

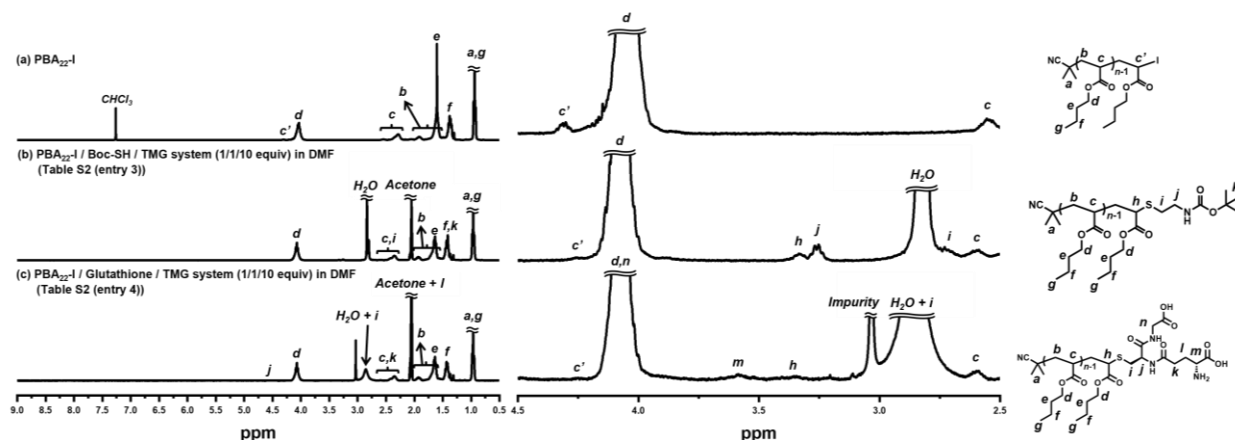

**Fig. S8.**  $^1\text{H}$  NMR spectra (acetone- $d_6$ ) of (a) the original PBA<sub>22</sub>-I, and the purified products after the reaction of PBA<sub>22</sub>-I (1 equiv), monothiol (1 equiv), catalyst (10 equiv), and DMF at ambient temperature for 2.5 h, where the monothiol was (b) Boc-SH and (c) Glutathione (Table S2 (entries 3 and 4) in Supporting Information).

**Table S2. Substitution of PBA–I with Monothiols (Small Molecular and Biological Thiol-Containing Compounds).**

| Entry | Monothiol   | [PBA <sub>22</sub> –I] <sup>a</sup> <sub>0</sub> /[monothiol] <sub>0</sub> /[TMG] <sub>0</sub> <sup>b</sup> | <i>M<sub>p</sub></i> <sup>c</sup> (g/mol)<br>of substituted<br>product | <i>M<sub>n</sub></i> <sup>c</sup> (g/mol) of<br>the entire<br>reaction mixture | <i>D</i> <sup>c</sup> of the<br>entire reaction<br>mixture | Substitution<br>yield <sup>d</sup> (%) |
|-------|-------------|-------------------------------------------------------------------------------------------------------------|------------------------------------------------------------------------|--------------------------------------------------------------------------------|------------------------------------------------------------|----------------------------------------|
| 1     | BMC         | 1/2/10                                                                                                      | 4600                                                                   | 4100                                                                           | 1.10                                                       | >90                                    |
| 2     | PEMC        | 1/2/10                                                                                                      | 4600                                                                   | 4300                                                                           | 1.08                                                       | >90                                    |
| 3     | Boc-SH      | 1/1/10                                                                                                      | 4700                                                                   | 4200                                                                           | 1.11                                                       | 70                                     |
| 4     | Glutathione | 1/1/10                                                                                                      | 4800                                                                   | 5200                                                                           | 1.59                                                       | 55                                     |

<sup>a</sup> *M<sub>n</sub>* = 3800 g/mol and *M<sub>p</sub>* = 4200 g/mol determined using PMMA-calibrated GPC (THF eluent) (**Table S1** (entry 1)). *M<sub>p</sub>* is the GPC peak-top molecular weight.

<sup>b</sup> PBA<sub>22</sub>–I was 10 wt% and DMF (solvent) was 90 wt%. The reaction mixture was stirred under dark at room temperature for 2.5 h. <sup>c</sup> Determined with PMMA-calibrated GPC (THF eluent). <sup>d</sup> The substitution yield was determined using <sup>1</sup>H NMR.

**Table S3. Substitution of PBA-I with PEG<sub>2k</sub>-SH (Monothiol) to Generate PBA-*b*-PEG Diblock Copolymer.**

| Entry | PBA-I                                                                                                                             | [PBA-I] <sub>0</sub> /[PEG <sub>2k</sub> -SH] <sup>b</sup> <sub>0</sub> /[TMG] <sub>0</sub> | <i>M<sub>p</sub></i> <sup>c</sup> (g/mol)<br>of substituted<br>product | <i>M<sub>n</sub></i> <sup>c</sup> (g/mol) of<br>the entire<br>reaction mixture | <i>D</i> <sup>c</sup> of the<br>entire reaction<br>mixture | Substitution<br>yield <sup>d</sup> (%) |
|-------|-----------------------------------------------------------------------------------------------------------------------------------|---------------------------------------------------------------------------------------------|------------------------------------------------------------------------|--------------------------------------------------------------------------------|------------------------------------------------------------|----------------------------------------|
| 1     | PBA <sub>22</sub> -I<br>( <i>M<sub>p</sub></i> = 4200 g/mol) <sup>a</sup><br>( <i>M<sub>n</sub></i> = 3800 g/mol) <sup>a</sup>    | 1/1/10                                                                                      | 8100                                                                   | 7200                                                                           | 1.08                                                       | 85                                     |
| 2     | PBA <sub>79</sub> -I<br>( <i>M<sub>p</sub></i> = 16000 g/mol) <sup>a</sup><br>( <i>M<sub>n</sub></i> = 15000 g/mol) <sup>a</sup>  | 1/1/10                                                                                      | 21000                                                                  | 18000                                                                          | 1.27                                                       | NA <sup>e</sup>                        |
| 3     | PBA <sub>156</sub> -I<br>( <i>M<sub>p</sub></i> = 24000 g/mol) <sup>a</sup><br>( <i>M<sub>n</sub></i> = 22000 g/mol) <sup>a</sup> | 1/1/10                                                                                      | 36000                                                                  | 20000 <sup>f</sup>                                                             | 1.98                                                       | NA <sup>e</sup>                        |

<sup>a</sup> Determined using PMMA-calibrated GPC (THF eluent) (**Table S1** (entries 1–3)). *M<sub>p</sub>* is the GPC peak-top molecular weight. <sup>b</sup> PBA-I was 10 wt% and DMF (solvent) was 90 wt%. The reaction mixture was stirred under dark at room temperature for 2.5 h. PEG<sub>2k</sub>-SH contained dimer of PEG<sub>2k</sub>-SH (~9%) and non-SH-terminated (H-terminated) PEG (~4%) according to the supplier (Aldrich). <sup>c</sup> Determined with PMMA-calibrated GPC (THF eluent). *M<sub>n</sub>* includes the remaining (unreacted PEG<sub>2k</sub>-SH). *M<sub>p</sub>* is the GPC peak-top molecular weight. <sup>d</sup> The substitution yield was determined from GPC peak areas of the substituted product and the original PBA-I. <sup>e</sup> The substitution yield was not able to determine because of the overlapped chromatograms of the substituted product and the original PBA-I. <sup>f</sup> *M<sub>n</sub>* appeared to be slightly lowered from the original PBA<sub>156</sub>-I after the substitution reaction because of the inclusion of the unreacted PEG<sub>2k</sub>-SH.

PBA-I / PEG<sub>2k</sub>SH / TMG system (1/1/10 equiv) in DMF (Table S3)

(a) Table S3 (entry 1)

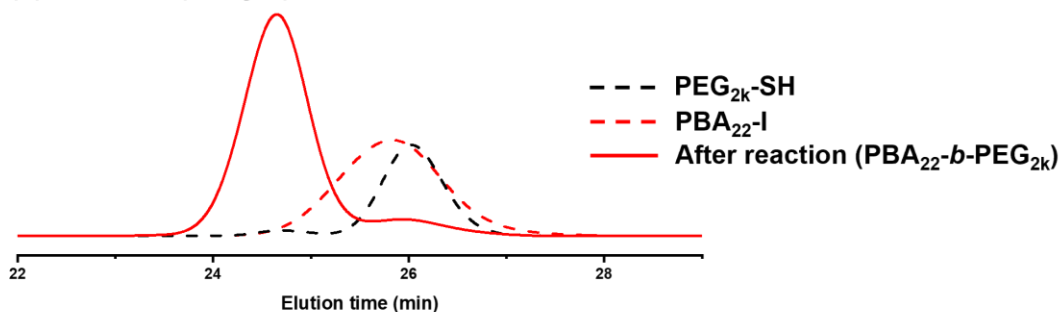

(b) Table S3 (entry 2)

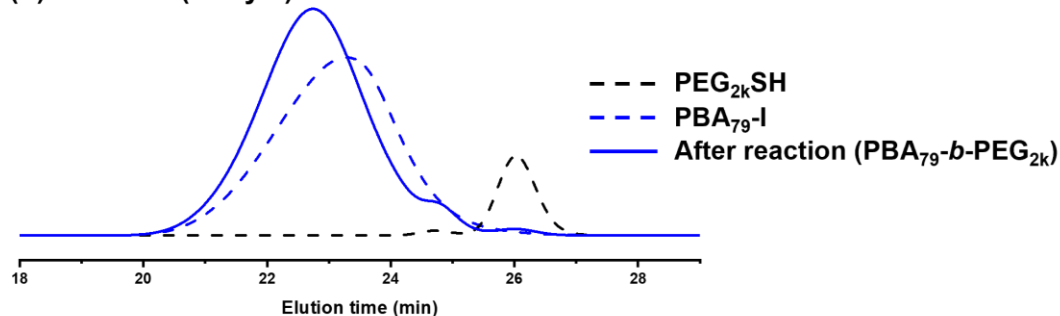

(c) Table S3 (entry 3)

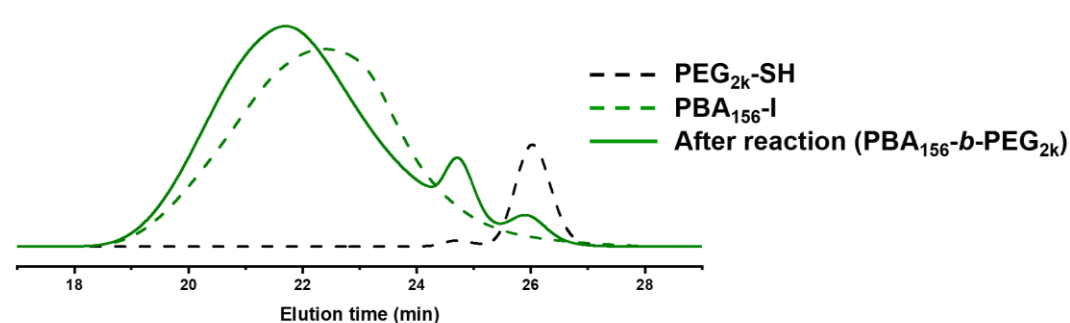

**Fig. S9.** GPC chromatograms of the original PEG<sub>2k</sub>-SH (black dashed lines), the original PBA-I (coloured dashed lines), and the reaction mixtures of PBA-I (1 equiv), PEG<sub>2k</sub>-SH (1 equiv), TMG (10 equiv), and DMF at ambient temperature for 2.5 h (coloured solid lines), where PBA-I is (a) PBA<sub>22</sub>-I (Table S3 (entry 1) in Supporting Information), (b) PBA<sub>79</sub>-I (Table S3 (entry 2)), and (c) PBA<sub>156</sub>-I (Table S3 (entry 3)).

PBA<sub>22</sub>-I / PEG-4SH / TMG system (4/1/20 equiv) in DMF (Table 2 (entries 6 and 7))

(a) Table 2 (entry 6)

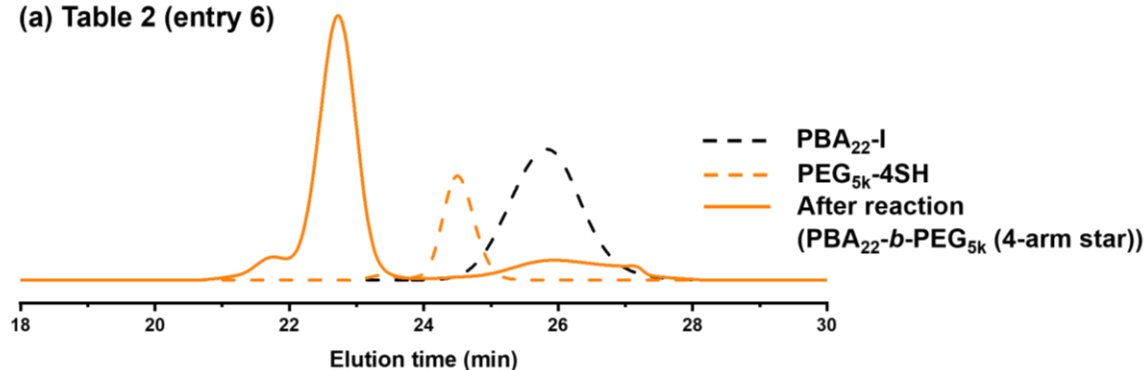

(b) Table 2 (entry 7)

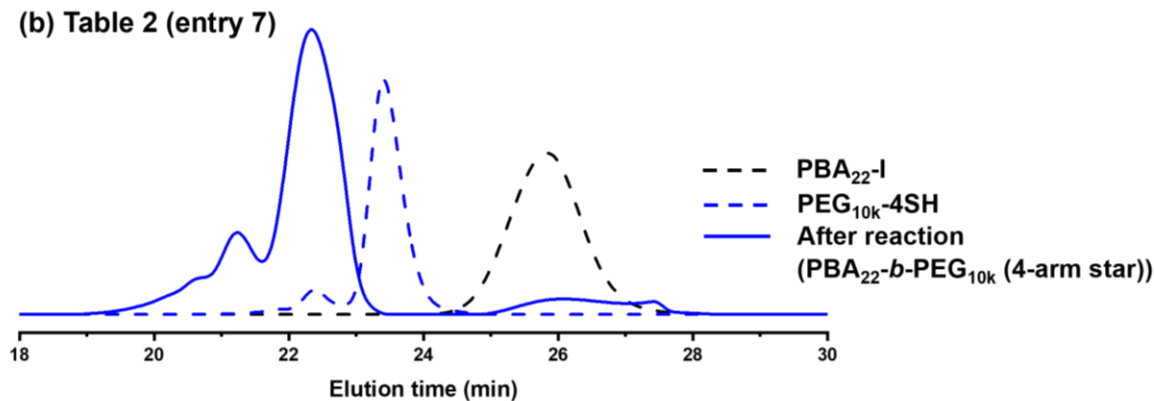

**Fig. S10.** GPC chromatograms of the original PBA<sub>22</sub>-I (black dashed line), the original PEG-4SH (coloured dashed lines), and the reaction mixtures of PBA<sub>22</sub>-I (4 equiv), PEG-4SH (1 equiv), TMG (20 equiv), and DMF at ambient temperature for 2.5 h (coloured solid lines), where PEG-4SH is (a) PEG<sub>5k</sub>-4SH (Table 2 (entry 6)) and (b) PEG<sub>10k</sub>-4SH (Table 2 (entry 7)).



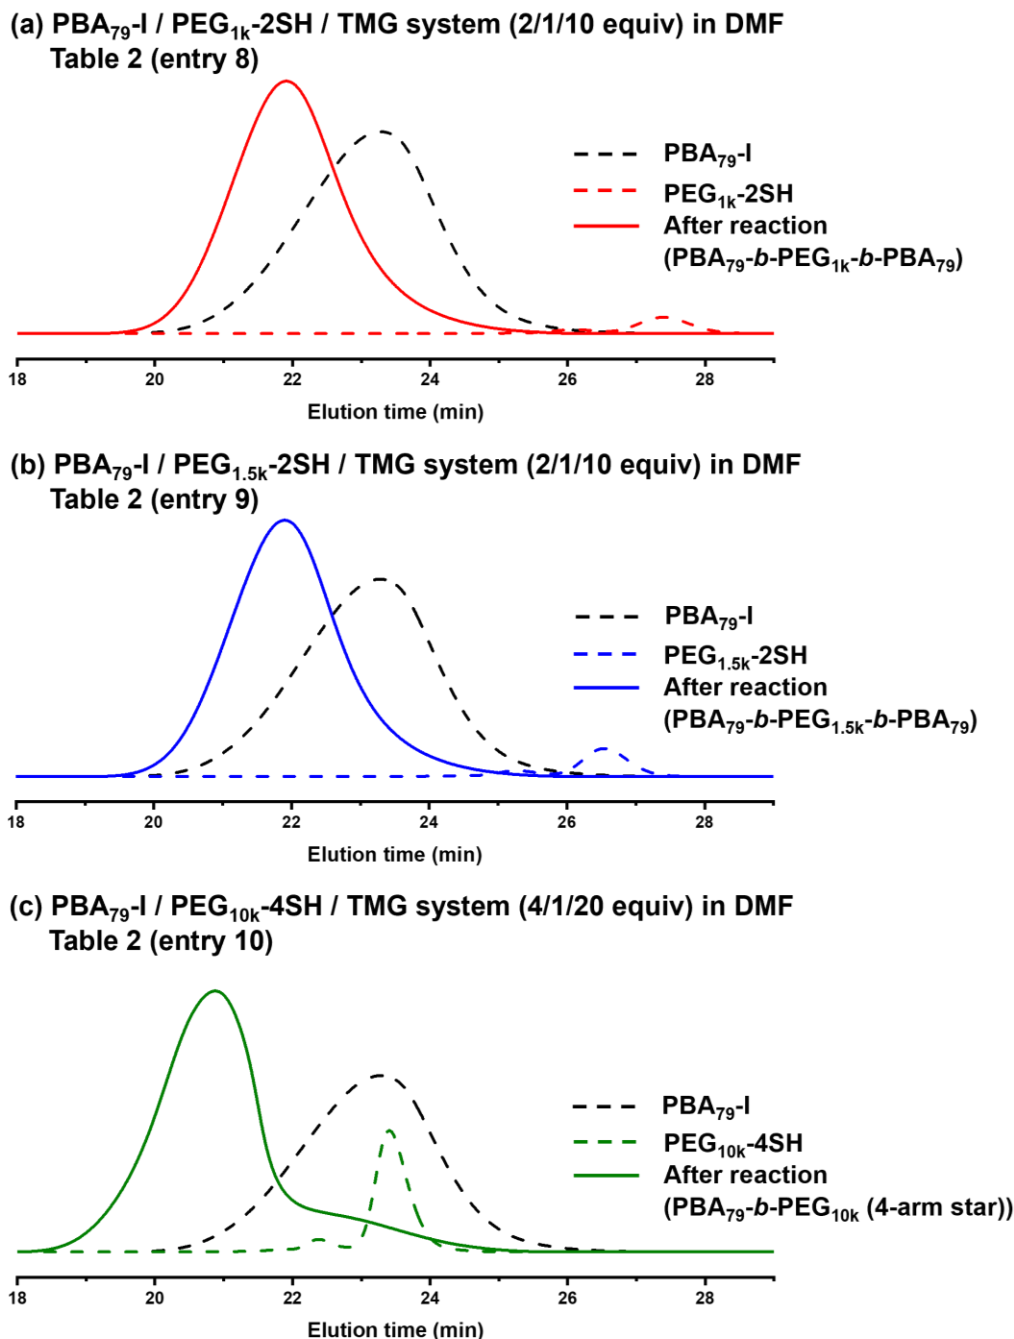

**Fig. S11 (continued).** GPC chromatograms of the original PBA-I (black dashed line), the original PEG-containing thiol (coloured dashed lines), and the reaction mixtures of PBA-I (2 or 4 equiv), PEG-containing thiol (1 equiv), TMG (10 or 20 equiv), and DMF at ambient temperature for 2.5 h (coloured solid lines), where PBA-I and PEG-containing thiol are (a) PBA<sub>79</sub>-I and PEG<sub>1k</sub>-2SH (Table 2 (entry 8)), (b) PBA<sub>79</sub>-I and PEG<sub>1.5k</sub>-2SH (Table 2 (entry 9)), and (c) PBA<sub>79</sub>-I and PEG<sub>10k</sub>-4SH (Table 2 (entry 10)), (d) PBA<sub>156</sub>-I and PEG<sub>1k</sub>-2SH (Table 2 (entry 11)), (e) PBA<sub>156</sub>-I and PEG<sub>1.5k</sub>-2SH (Table 2 (entry 12)), and (f) PBA<sub>156</sub>-I and PEG<sub>10k</sub>-4SH (Table 2 (entry 13)), respectively.

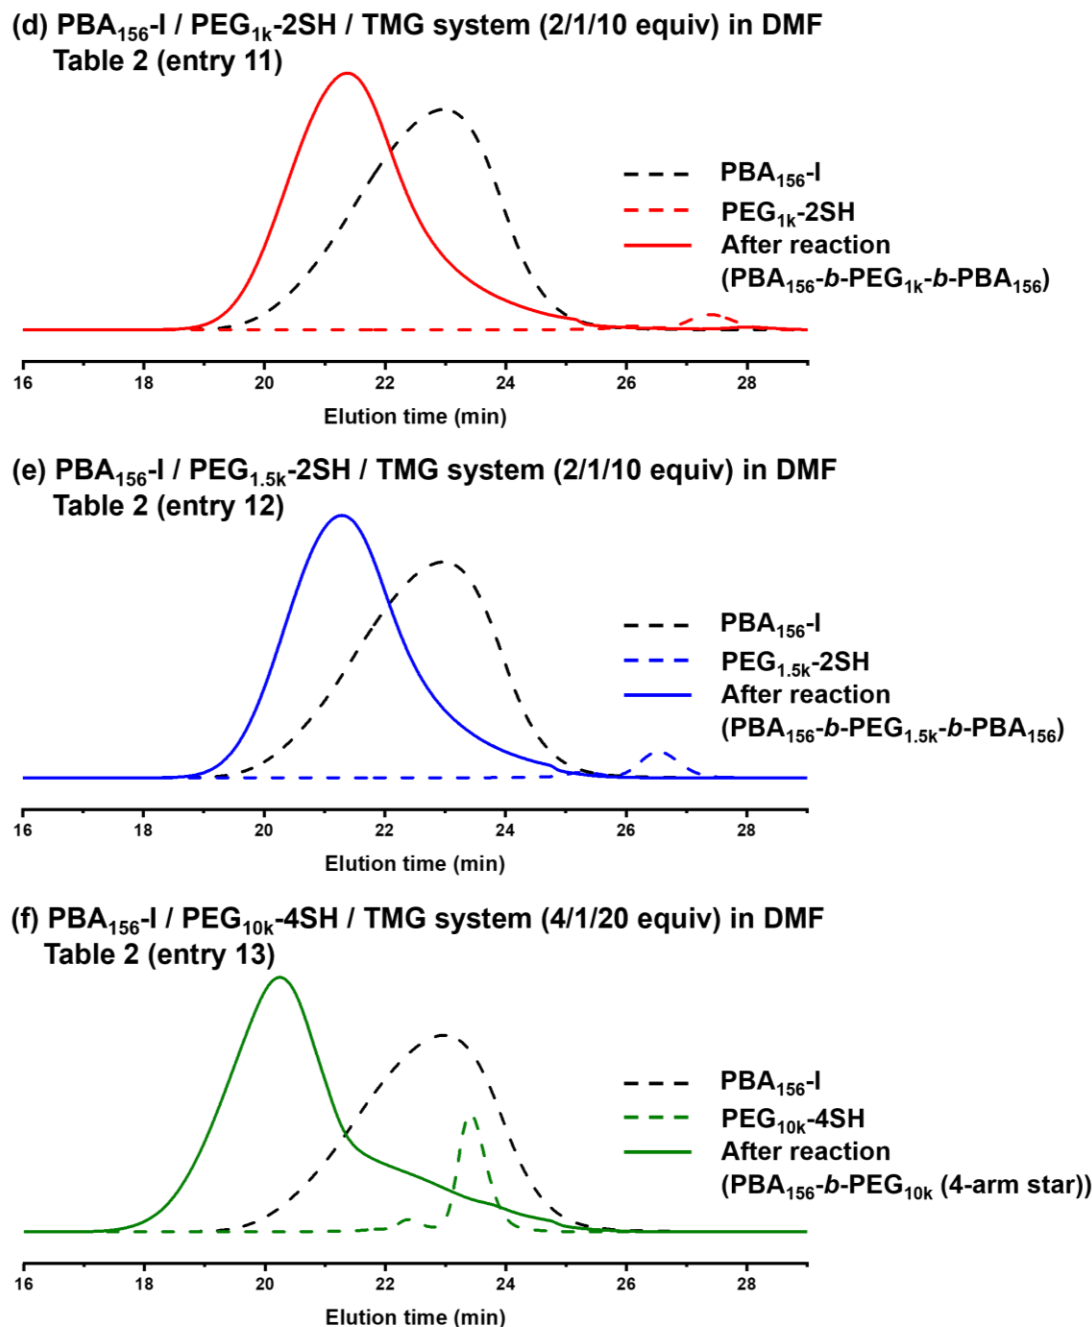

**Fig. S11.** GPC chromatograms of the original PBA-I (black dashed line), the original PEG-containing thiol (coloured dashed lines), and the reaction mixtures of PBA-I (2 or 4 equiv), PEG-containing thiol (1 equiv), TMG (10 or 20 equiv), and DMF at ambient temperature for 2.5 h (coloured solid lines), where PBA-I and PEG-containing thiol are (a) PBA<sub>79</sub>-I and PEG<sub>1k</sub>-2SH (Table 2 (entry 8)), (b) PBA<sub>79</sub>-I and PEG<sub>1.5k</sub>-2SH (Table 2 (entry 9)), and (c) PBA<sub>79</sub>-I and PEG<sub>10k</sub>-4SH (Table 2 (entry 10)), (d) PBA<sub>156</sub>-I and PEG<sub>1k</sub>-2SH (Table 2 (entry 11)), (e) PBA<sub>156</sub>-I and PEG<sub>1.5k</sub>-2SH (Table 2 (entry 12)), and (f) PBA<sub>156</sub>-I and PEG<sub>10k</sub>-4SH (Table 2 (entry 13)), respectively.

**Table S4.  $T_{d,5\%}$ ,  $T_g$ , and  $T_m$  values of Block Copolymers, Original PEG thiols, and Original PBA-I.**

| Entry | Polymer                                                                                      | Synthetic condition       | $T_{d,5\%}$ (°C) | $T_g$ (°C)      | $T_m$ (°C)      |
|-------|----------------------------------------------------------------------------------------------|---------------------------|------------------|-----------------|-----------------|
| 1     | PBA <sub>22</sub> - <i>b</i> -PEG <sub>2k</sub> (diblock)                                    | <b>Table S3</b> (entry 1) | 334              | −50             | 39              |
| 2     | PBA <sub>22</sub> - <i>b</i> -PEG <sub>1.5k</sub> - <i>b</i> -PBA <sub>22</sub> (triblock)   | <b>Table 2</b> (entry 3)  | 335              | −58             | NA <sup>b</sup> |
| 3     | PBA <sub>22</sub> - <i>b</i> -PEG <sub>10k</sub> (4 arm star)                                | <b>Table 2</b> (entry 7)  | 343              | −47             | 40              |
| 4     | PBA <sub>79</sub> - <i>b</i> -PEG <sub>2k</sub> (diblock)                                    | <b>Table S3</b> (entry 2) | 301              | −47             | 36              |
| 5     | PBA <sub>79</sub> - <i>b</i> -PEG <sub>1.5k</sub> - <i>b</i> -PBA <sub>79</sub> (triblock)   | <b>Table 2</b> (entry 9)  | 317              | −50             | NA <sup>b</sup> |
| 6     | PBA <sub>79</sub> - <i>b</i> -PEG <sub>10k</sub> (4 arm star)                                | <b>Table 2</b> (entry 10) | 303              | −47             | 37              |
| 7     | PBA <sub>156</sub> - <i>b</i> -PEG <sub>2k</sub> (diblock)                                   | <b>Table S3</b> (entry 3) | 302              | −47             | 36              |
| 8     | PBA <sub>156</sub> - <i>b</i> -PEG <sub>1.5k</sub> - <i>b</i> -PBA <sub>156</sub> (triblock) | <b>Table 2</b> (entry 12) | 311              | −49             | NA <sup>b</sup> |
| 9     | PBA <sub>156</sub> - <i>b</i> -PEG <sub>10k</sub> (4 arm star)                               | <b>Table 2</b> (entry 13) | 342              | −48             | 40              |
| C1    | PEG <sub>2k</sub> -SH (monothiol)                                                            | NA <sup>a</sup>           | 330              | NA <sup>b</sup> | 58              |
| C2    | PEG <sub>1.5k</sub> -2SH (dithiol)                                                           | NA <sup>a</sup>           | 331              | NA <sup>b</sup> | 52              |
| C3    | PEG <sub>10k</sub> -4SH (tetrathiol)                                                         | NA <sup>a</sup>           | 312              | NA <sup>b</sup> | 58              |
| C4    | PBA <sub>156</sub> -I                                                                        | <b>Table S1</b> (entry 3) | 315              | −50             | NA <sup>b</sup> |

<sup>a</sup> Purchased from Sigma-Aldrich. <sup>b</sup> Not clearly observed.

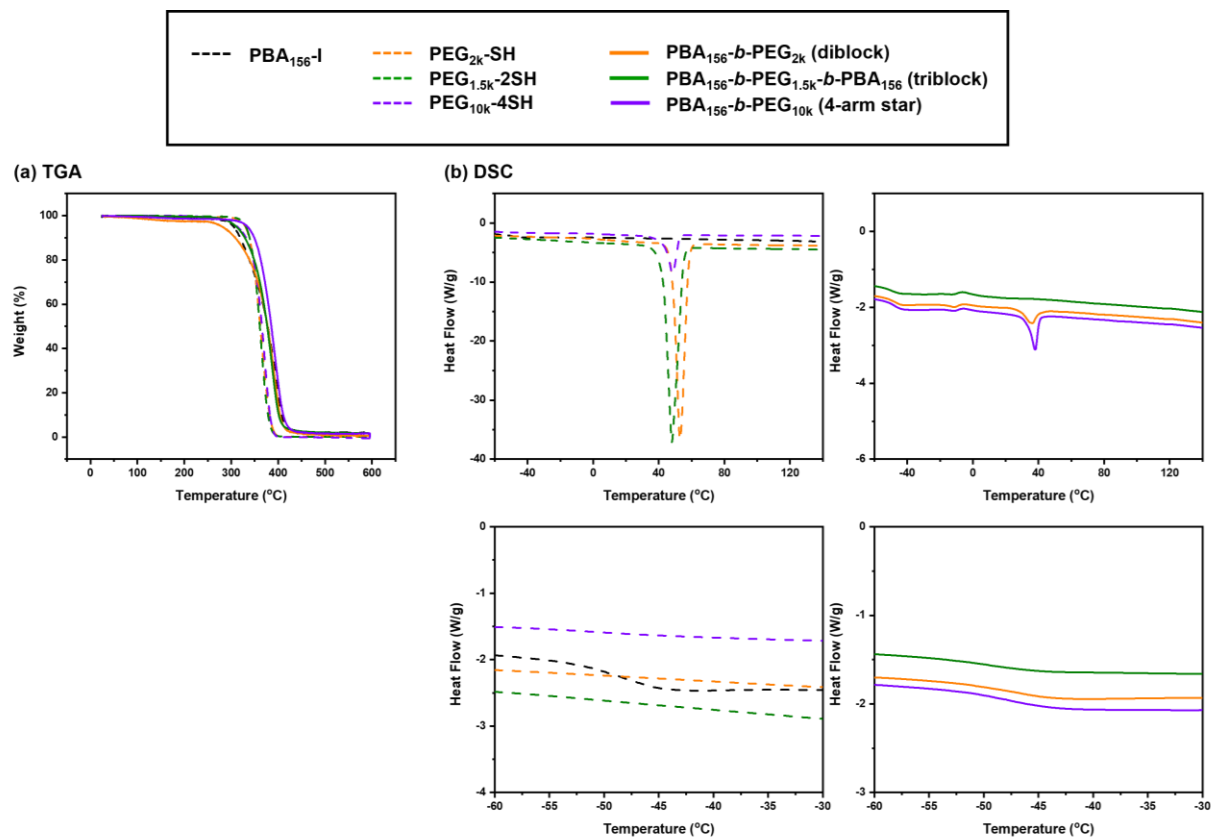

**Fig. S12.** (a) TGA and (b) DSC curves of the original  $PBA_{156}$ -I (black dashed lines) and the original PEG-based thiols ( $PEG_{2k}$ -SH,  $PEG_{1.5k}$ -2SH, and  $PEG_{10k}$ -4SH) (coloured dashed lines), and the block copolymers ( $PBA_{156}$ -*b*- $PEG_{2k}$  (diblock) (**Table S3** (entry 3) in Supporting Information),  $PBA_{156}$ -*b*- $PEG_{1.5k}$ -*b*- $PBA_{156}$  (triblock) (**Table 2** (entry 12)), and  $PBA_{156}$ -*b*- $PEG_{10k}$  (4 arm star) (**Table 2** (entry 13))) (coloured solid lines). The thiols and block copolymers are indicated in the figure.

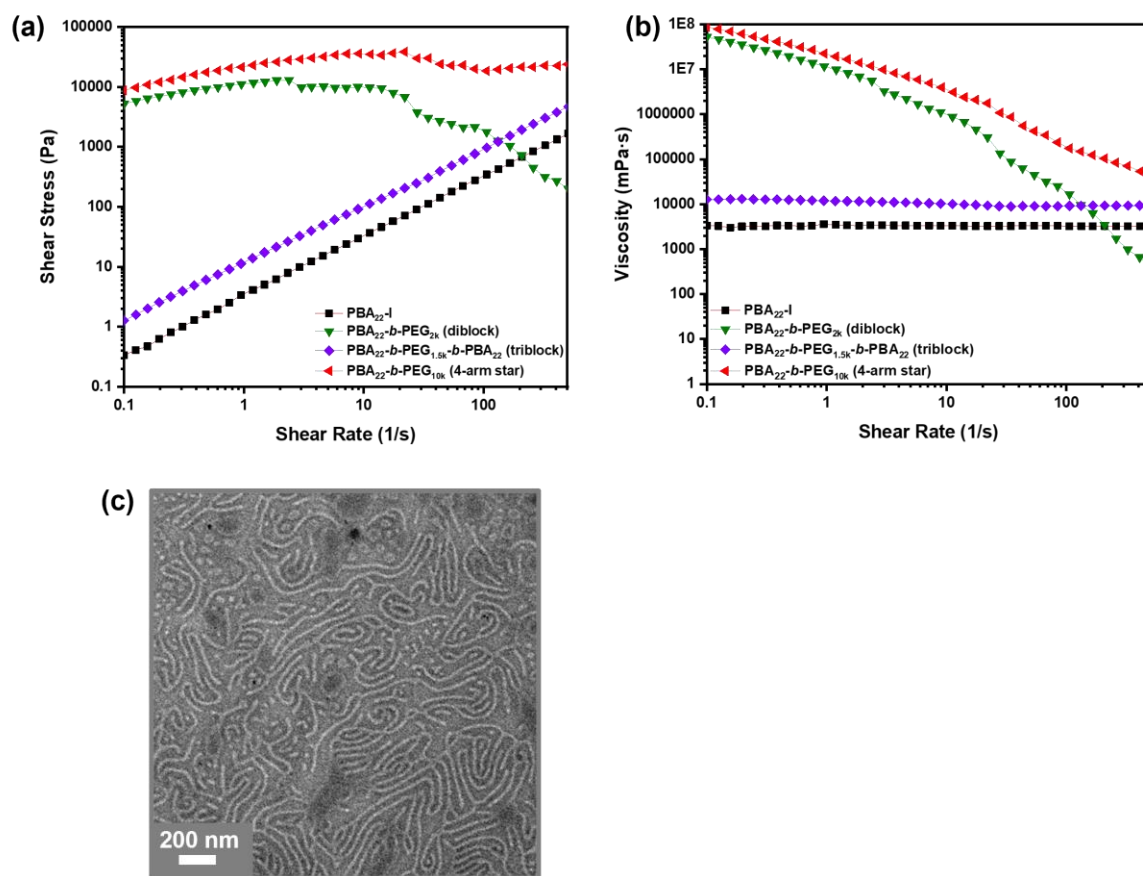

**Fig. S13.** Plots of (a) shear stress and (b) viscosity vs shear rate for PBA<sub>22</sub>-I, and PBA<sub>22</sub>-*b*-PEG<sub>2k</sub> (diblock), PBA<sub>22</sub>-*b*-PEG<sub>1.5k</sub>-*b*-PBA<sub>22</sub> (triblock), and PBA<sub>22</sub>-*b*-PEG<sub>10k</sub> (4-arm star) at 25 °C. (c) TEM image of drop-cast film of PBA<sub>22</sub>-*b*-PEG<sub>10k</sub> (4-arm star).

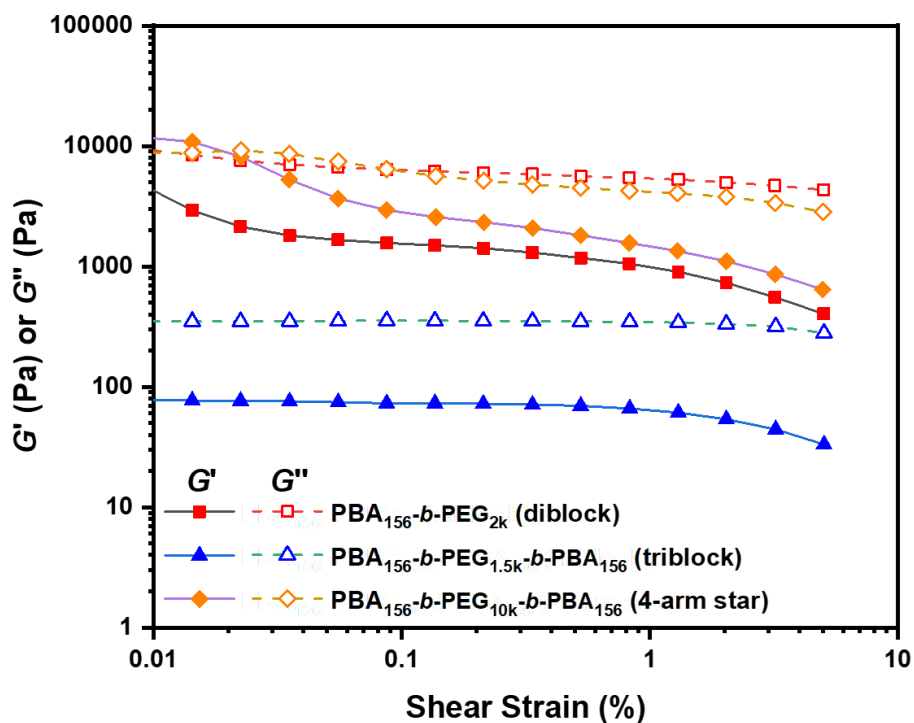

**Fig. S14.** Plots of  $G'$  (filled symbols) and  $G''$  (open symbols) vs shear strain at 25 °C at a constant frequency of  $\omega = 10$  rad/s (amplitude sweep experiment) for  $\text{PBA}_{156}\text{-}b\text{-PEG}_{2k}$  (diblock),  $\text{PBA}_{156}\text{-}b\text{-PEG}_{1.5k}\text{-}b\text{-PBA}_{156}$  (triblock), and  $\text{PBA}_{156}\text{-}b\text{-PEG}_{10k}\text{-}b\text{-PBA}_{156}$  (4-arm star). The polymers are indicated in the figure.

### 3. Determination of Coupling and Substitution Yields

**Determination of Coupling Yield Using GPC Chromatogram.** An example of the GPC peak resolution is given in **Figure S3** in Supporting Information. The coupling yield was determined from GPC peak areas of the coupling product and the unreacted original PBA-I (or PBA-Br) according to **Equation S1**.

$$\text{Coupling yield} = \left[ 1 - \frac{(\text{area of remaining PBA} - \text{I})}{(\text{areas of coupling product}) + (\text{area of remaining PBA} - \text{I})} \right] \times 100\%$$

**(Equation S1)**

**Determination of Substitution Yield Using NMR Spectrum.** For monothiols (BMC, PEMC, Boc-SH, and Glutathione) (**Table S2** in Supporting Information), the substitution yield was determined using  $^1\text{H}$  NMR. For example, the substitution yield for the BMC system (**Table S2** (entry 1) in Supporting Information) was determined as follows. For the original PBA-I (**Figure S7a** in Supporting Information), the *CH* proton (*c'*) adjacent to iodide at the terminal unit of PBA appeared at 4.30 ppm. After the substitution reaction (**Figure S7b** in Supporting Information), the signal for the proton *c'* decayed and a new signal for the *CH* proton (*h*)<sup>2</sup> adjacent to sulfur at the terminal unit of PBA appeared at 3.12 ppm. The substitution yield was determined according to **Equation S2**.

$$\text{Substitution Yield (\%)} = \frac{(\text{peak area of proton } h)}{(\text{peak area of proton } c') + (\text{peak area of proton } h)} \times 100\%$$

**(Equation S2)**

## REFERENCES

- 1 A. Anastasaki, V. Nikolaou, Q. Zhang, J. Burns, S. R. Samanta, C. Waldron, A. J. Haddleton, R. McHale, D. Fox, V. Percec, P. Wilson, D. M. Haddleton, *J. Am. Chem. Soc.* 2014, **136**, 1141-1149.
- 2 X. M. Sim, C. Chen, A. Goto, *ACS Appl. Mater. Interface.* 2021, **13**, 24183-24193.
